# Supplementary material
Source: PubMed Central journal article supplement (PMC9118341)
Supplement: NIHMS1799235-supplement-Supplementary_material-2.pdf [file NIHMS1799235-supplement-Supplementary_material-2.pdf]

**Supplemental Table 1:** Pain scores on NPRS at each time point (n=10).

| <b>Baseline</b>      | <b>5 min</b>                | <b>10 min</b>                 | <b>15 min</b>                 | <b>30 min</b>                 | <b>45 min</b>                 | <b>60 min</b>                 | <b>120 min</b>                | <b>180 min</b>                | <b>240 min</b>                |
|----------------------|-----------------------------|-------------------------------|-------------------------------|-------------------------------|-------------------------------|-------------------------------|-------------------------------|-------------------------------|-------------------------------|
| <b>Visit one</b>     |                             |                               |                               |                               |                               |                               |                               |                               |                               |
| 7.5 (6-8)            | 6 (5 - 8)                   | 6 (5 - 8)                     | 5 (4 - 7)                     | 4.5 (2 - 7)                   | 5 (3 - 7)                     | 4.5 (3 - 6)                   | 4.5 (3 - 7)                   | 5 (3 - 6)                     | 5 (3 - 7)                     |
| Change from baseline | 0.5 (0 - 2)<br>p=0.063      | 0.5 (0 - 3)<br>p=0.062        | <b>1 (1 - 2)</b><br>p=0.004   | <b>1 (1 - 5)</b><br>p=0.004   | <b>1 (1 - 4)</b><br>p=0.008   | <b>1.5 (1 - 4)</b><br>p=0.002 | <b>1.5 (0 - 3)</b><br>p=0.016 | <b>2 (0 - 3)</b><br>p=0.016   | <b>1.5 (1 - 2)</b><br>p=0.008 |
| <b>Visit two</b>     |                             |                               |                               |                               |                               |                               |                               |                               |                               |
| 6 (5 - 8)            | <b>1 (0 - 3)</b>            | <b>0 (0 - 3)</b>              | <b>1.5 (0 - 3)</b>            | <b>2.5 (0 - 5)</b>            | <b>3 (0 - 5)</b>              | <b>3.5 (1 - 5)</b>            | <b>3.5 (1 - 4)</b>            | <b>4 (1 - 5)</b>              | <b>3 (1 - 4)</b>              |
| Change from baseline | <b>4 (3 - 7)</b><br>p=0.002 | <b>5.5 (3 - 7)</b><br>p=0.002 | <b>4.5 (3 - 6)</b><br>p=0.002 | <b>2.5 (1 - 6)</b><br>p=0.004 | <b>2.5 (1 - 5)</b><br>p=0.004 | <b>2 (1 - 4)</b><br>p=0.004   | <b>2 (2 - 4)</b><br>p=0.008   | <b>1.5 (1 - 3)</b><br>p=0.008 | <b>2 (2 - 3)</b><br>p=0.008   |
| <b>Visit three</b>   |                             |                               |                               |                               |                               |                               |                               |                               |                               |
| 5.5 (5 - 7)          | 5 (4 - 6)                   | <b>3 (3 - 6)</b>              | <b>3.5 (3 - 6)</b>            | <b>3.5 (2 - 6)</b>            | <b>3 (2 - 4)</b>              | <b>2.5 (2 - 3)</b>            | <b>3 (2 - 3)</b>              | <b>3 (2 - 3)</b>              | <b>3 (3 - 4)</b>              |
| Change from baseline | 0.5 (0 - 1)<br>p=0.06       | <b>2 (2 - 3)</b><br>p=0.04    | <b>2 (1 - 3)</b><br>p=0.004   | <b>2 (1 - 3)</b><br>p=0.004   | <b>2 (2 - 3)</b><br>p=0.004   | <b>3 (2 - 3)</b><br>p=0.002   | <b>2 (2 - 4)</b><br>p=0.002   | <b>2 (1 - 5)</b><br>p=0.004   | <b>2 (1 - 2)</b><br>p=0.008   |
| <b>Visit four</b>    |                             |                               |                               |                               |                               |                               |                               |                               |                               |
| 6 (6 - 8)            | <b>5 (3 - 5)</b>            | <b>4 (2 - 5)</b>              | <b>3 (2 - 5)</b>              | <b>2 (2 - 5)</b>              | <b>2 (2 - 4)</b>              | <b>2 (1 - 5)</b>              | <b>2 (1 - 5)</b>              | <b>2.5 (1 - 6)</b>            | <b>5 (2 - 6)</b>              |
| Change from baseline | <b>1 (0 - 2)</b><br>p=0.047 | <b>2 (1 - 3)</b><br>p=0.008   | <b>4 (3 - 4)</b><br>p=0.004   | <b>4 (2 - 4)</b><br>p=0.004   | <b>4 (4 - 4)</b><br>p=0.008   | <b>4 (3 - 5)</b><br>p=0.008   | <b>4 (2 - 5)</b><br>p=0.008   | <b>3 (1 - 5)</b><br>p=0.008   | <b>1 (1 - 4)</b><br>p=0.008   |

Data presented as median (interquartile range). Shapiro-Wilk test used to test for normality and more than 80 percent of the time point values were found to have not normal distribution. Therefore, all P-values presented here are for Wilcoxon Signed Rank test for not normally distributed data. Data points with p-values <0.05 are bolded.
